# Supplementary material for: Analysis of the Associations of Measurements of Body Composition and Inflammatory Factors with Cardiovascular Disease and Its Comorbidities in a Community-Based Study
Source: MDPI journal article supplement (doi:10.3390/biomedicines12051066), 2024-05-11
Supplement: s1 [file s1]

**Table S1.** Baseline characteristics of the study population according to sex

| Characteristics                   | Male, N=490  | Female, N=589 | P                     |
|-----------------------------------|--------------|---------------|-----------------------|
| Age (years)                       | 42.76±0.62   | 43.20±0.56    | NS                    |
| BMI (kg/m <sup>2</sup> )          | 27.53±0.19   | 28.39±0.23    | 0.005                 |
| Waist circumference (cm)          | 96.22±0.51   | 94.04±0.60    | 0.007                 |
| FM/WT (kg/kg)                     | 0.25±0.002   | 0.36±0.003    | 0.001                 |
| SMM/WT (kg/kg)                    | 0.37±0.002   | 0.27±0.001    | 0.001                 |
| TBW (L)                           | 45.28±0.26   | 33.44±0.16    | 0.001                 |
| ECW                               | 0.86±0.007   | 0.99±0.007    | 0.001                 |
| GDF-15 (pg/ml)                    | 520.47±14.69 | 460.73±13.10  | 0.002                 |
| Follistatin (pg/ml)               | 612.26±21.37 | 619.21±23.16  | NS                    |
| Chemerin (ng/ml)                  | 88.41±1.24   | 90.41±1.17    | NS                    |
| Leptin (ng/ml)                    | 11.43±0.47   | 33.60±0.92    | 0.001                 |
| Adiponectin (µg/ml)               | 3.36±0.06    | 4.48±0.07     | 0.001                 |
| L/A ratio                         | 3.93±0.18    | 8.76±0.29     | 0.001                 |
| Lymphocytes (×10 <sup>9</sup> /L) | 2.40±0.03    | 2.09±0.02     | 0.00001               |
| PT                                | 1.04±0.02    | 0.98±0.01     | 0.01                  |
| CRP (mg/L)                        | 1.26±0.19    | 1.19±0.15     | NS                    |
| SIRI                              | 0.87±0.02    | 0.70±0.01     | 1.11×10 <sup>-9</sup> |

Data presented as mean, standard errors; N, sample size; BMI, body mass index; FM/WT, fat mass/weight ratio; SMM/WT, skeletal muscle mass/weight ratio; TBW, total body water; ECW, extracellular water; GDF-15, growth differentiation factor-15; L/A ratio, leptin/adiponectin ratio; PT, prothrombin time; CRP, C-reactive protein, SIRI, systemic inflammation response index. P# shows significance levels achieved upon comparing sexes by t-test, NS, non-significant.

**Table S2.** Pearson correlations between measurements of body composition and plasma levels of soluble markers in the study population by sex; male correlations are shown above the diagonal and female below. All the variables were adjusted for age prior to the analysis.

|                    | <b>BMI</b>         | <b>Waist</b>       | <b>FM/WT</b>       | <b>SMM/WT</b>      | <b>ECW</b>         | <b>GDF-15</b>      | <b>Chemerin</b>    | <b>Adiponectin</b> | <b>Follistatin</b> | <b>Leptin</b>      | <b>L/A ratio</b>   | <b>SIRI</b>        |
|--------------------|--------------------|--------------------|--------------------|--------------------|--------------------|--------------------|--------------------|--------------------|--------------------|--------------------|--------------------|--------------------|
| <b>BMI</b>         |                    | 0.87 <sup>2</sup>  | 0.76 <sup>2</sup>  | -0.77 <sup>2</sup> | 0.58 <sup>2</sup>  | 0.18 <sup>2</sup>  | 0.34 <sup>2</sup>  | -0.16 <sup>2</sup> | 0.06 <sup>n</sup>  | 0.67 <sup>2</sup>  | 0.58 <sup>2</sup>  | 0.03 <sup>n</sup>  |
| <b>Waist</b>       | 0.88 <sup>2</sup>  |                    | 0.78 <sup>2</sup>  | -0.79 <sup>2</sup> | 0.66 <sup>2</sup>  | 0.25 <sup>2</sup>  | 0.36 <sup>2</sup>  | -0.12 <sup>2</sup> | 0.08 <sup>n</sup>  | 0.54 <sup>2</sup>  | 0.64 <sup>2</sup>  | 0.03 <sup>n</sup>  |
| <b>FM/WT</b>       | 0.86 <sup>2</sup>  | 0.83 <sup>2</sup>  |                    | -0.96 <sup>2</sup> | 0.48 <sup>2</sup>  | 0.25 <sup>2</sup>  | 0.33 <sup>2</sup>  | -0.07 <sup>1</sup> | 0.04 <sup>n</sup>  | 0.55 <sup>2</sup>  | 0.66 <sup>2</sup>  | 0.06 <sup>n</sup>  |
| <b>SMM/WT</b>      | -0.80 <sup>2</sup> | -0.80 <sup>2</sup> | -0.94 <sup>2</sup> |                    | -0.42 <sup>2</sup> | -0.32 <sup>2</sup> | -0.34 <sup>2</sup> | 0.09 <sup>1</sup>  | -0.05 <sup>n</sup> | -0.52 <sup>2</sup> | -0.67 <sup>2</sup> | -0.07 <sup>n</sup> |
| <b>ECW</b>         | 0.67 <sup>2</sup>  | 0.65 <sup>2</sup>  | 0.65 <sup>2</sup>  | -0.49 <sup>2</sup> |                    | 0.23 <sup>2</sup>  | 0.28 <sup>2</sup>  | 0.04 <sup>n</sup>  | 0.03 <sup>n</sup>  | 0.38 <sup>2</sup>  | 0.33 <sup>2</sup>  | 0.04 <sup>n</sup>  |
| <b>GDF-15</b>      | 0.42 <sup>2</sup>  | 0.45 <sup>2</sup>  | 0.39 <sup>2</sup>  | -0.44 <sup>2</sup> | 0.37 <sup>2</sup>  |                    | 0.27 <sup>2</sup>  | -0.03 <sup>n</sup> | 0.09 <sup>n</sup>  | 0.15 <sup>2</sup>  | 0.17 <sup>2</sup>  | 0.17 <sup>2</sup>  |
| <b>Chemerin</b>    | 0.48 <sup>2</sup>  | 0.46 <sup>2</sup>  | 0.44 <sup>2</sup>  | -0.46 <sup>2</sup> | 0.33 <sup>2</sup>  | 0.44 <sup>2</sup>  |                    | -0.06 <sup>n</sup> | 0.16 <sup>2</sup>  | 0.35 <sup>2</sup>  | 0.38 <sup>2</sup>  | 0.06 <sup>n</sup>  |
| <b>Adiponectin</b> | -0.15 <sup>2</sup> | -0.14 <sup>2</sup> | -0.06 <sup>n</sup> | 0.06 <sup>n</sup>  | -0.01 <sup>n</sup> | 0.02 <sup>n</sup>  | -0.02 <sup>n</sup> |                    | -0.01 <sup>n</sup> | 0.04 <sup>n</sup>  | -0.42 <sup>2</sup> | -0.03 <sup>n</sup> |
| <b>Follistatin</b> | 0.17 <sup>2</sup>  | 0.18 <sup>2</sup>  | 0.17 <sup>2</sup>  | -0.19 <sup>2</sup> | 0.14 <sup>2</sup>  | 0.25 <sup>2</sup>  | 0.30 <sup>2</sup>  | 0.06 <sup>n</sup>  |                    | -0.00 <sup>n</sup> | 0.00 <sup>n</sup>  | 0.06 <sup>n</sup>  |
| <b>Leptin</b>      | 0.61 <sup>2</sup>  | 0.57 <sup>2</sup>  | 0.63 <sup>2</sup>  | -0.59 <sup>2</sup> | 0.42 <sup>2</sup>  | 0.36 <sup>2</sup>  | 0.47 <sup>2</sup>  | 0.01 <sup>n</sup>  | 0.11 <sup>1</sup>  |                    | 0.73 <sup>2</sup>  | -0.01              |
| <b>L/A ratio</b>   | 0.59 <sup>2</sup>  | 0.57 <sup>2</sup>  | 0.60 <sup>2</sup>  | -0.59 <sup>2</sup> | 0.34 <sup>2</sup>  | 0.27 <sup>2</sup>  | 0.41 <sup>2</sup>  | -0.45 <sup>2</sup> | 0.09 <sup>1</sup>  | 0.77 <sup>2</sup>  |                    | -0.00 <sup>n</sup> |
| <b>SIRI</b>        | 0.03 <sup>n</sup>  | 0.01 <sup>n</sup>  | 0.08 <sup>n</sup>  | -0.04 <sup>n</sup> | 0.06 <sup>n</sup>  | 0.02 <sup>n</sup>  | 0.03 <sup>n</sup>  | -0.09 <sup>1</sup> | 0.03 <sup>n</sup>  | 0.07 <sup>n</sup>  | 0.09 <sup>n</sup>  |                    |
